# Supplementary material for: Suppression of ADP-ribosylation reversal triggers cell vulnerability to alkylating agents
Source: PubMed Central journal article supplement (PMC11648251; doi:10.1016/j.neo.2024.101092), 2024-11-29

FIGURE 1B

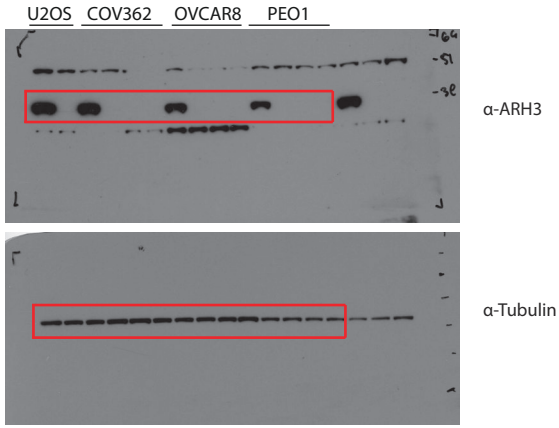

FIGURE 3A

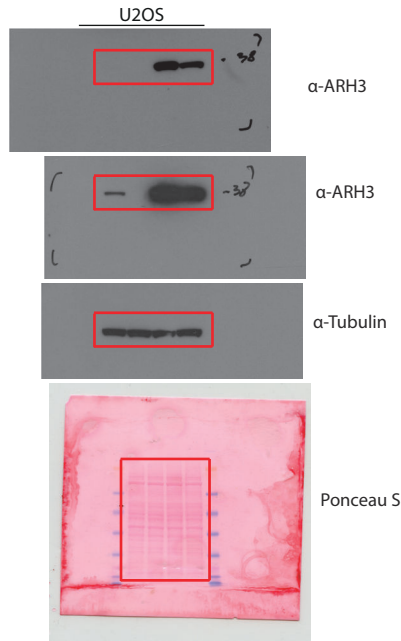

FIGURE 5A

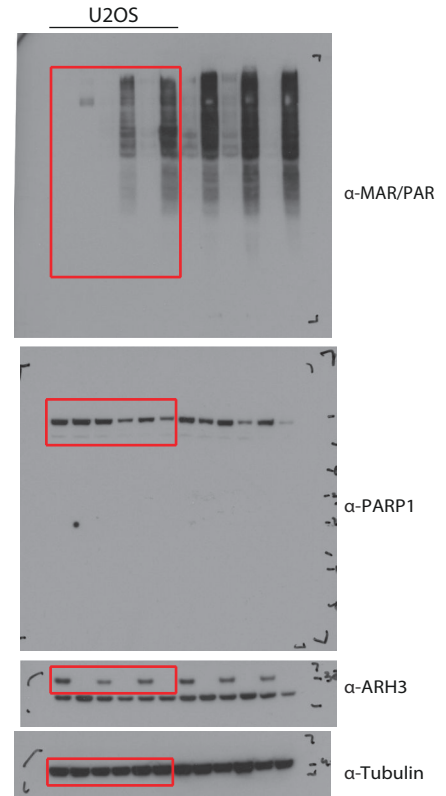

FIGURE 5B

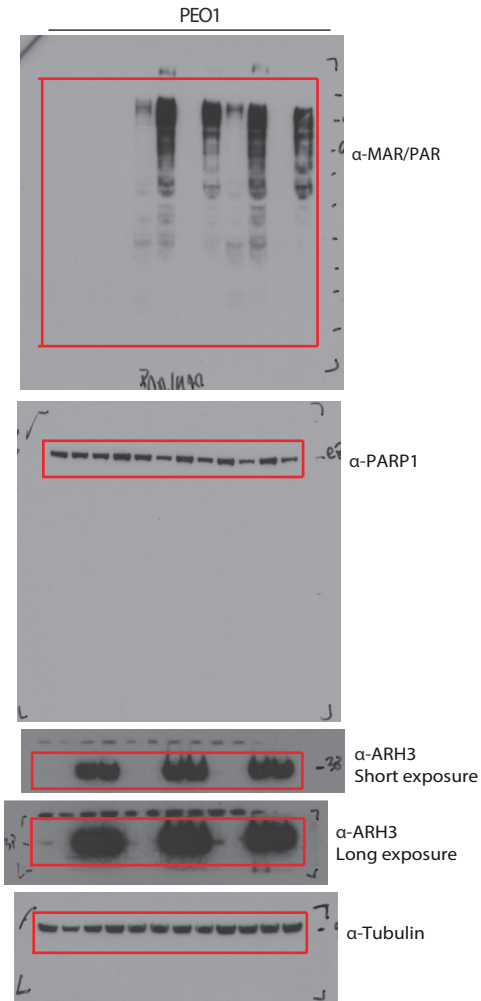

FIGURE 5C

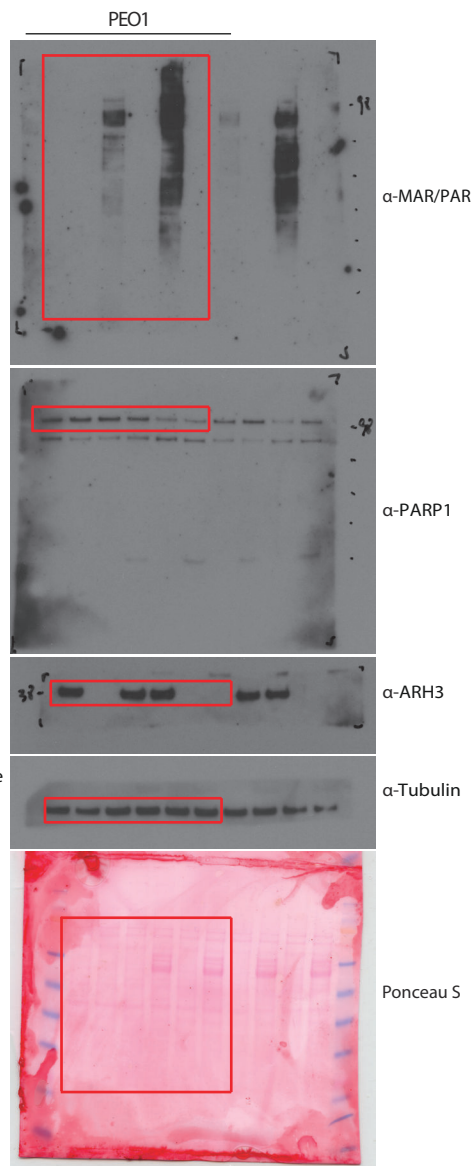



FIGURE S2B

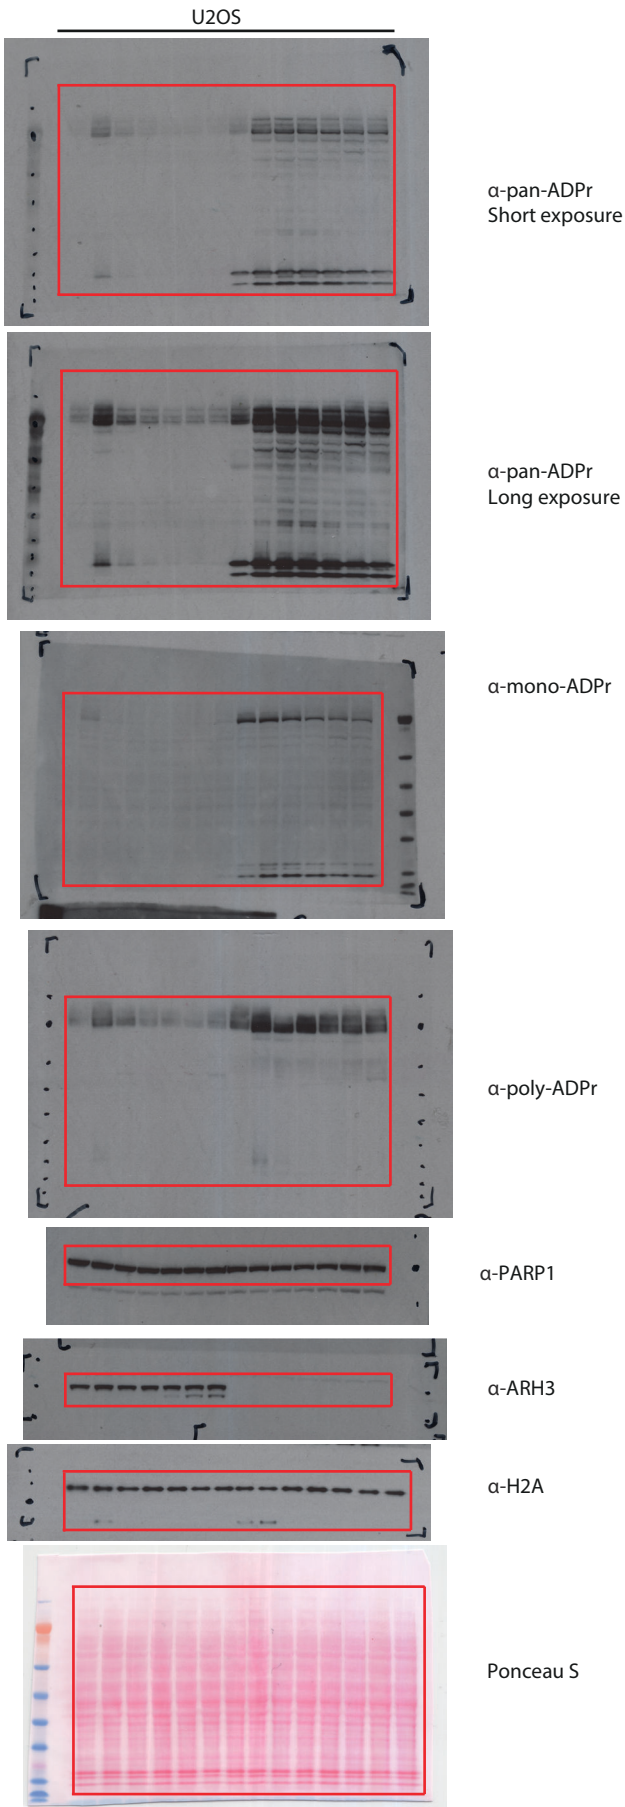

FIGURE S3A

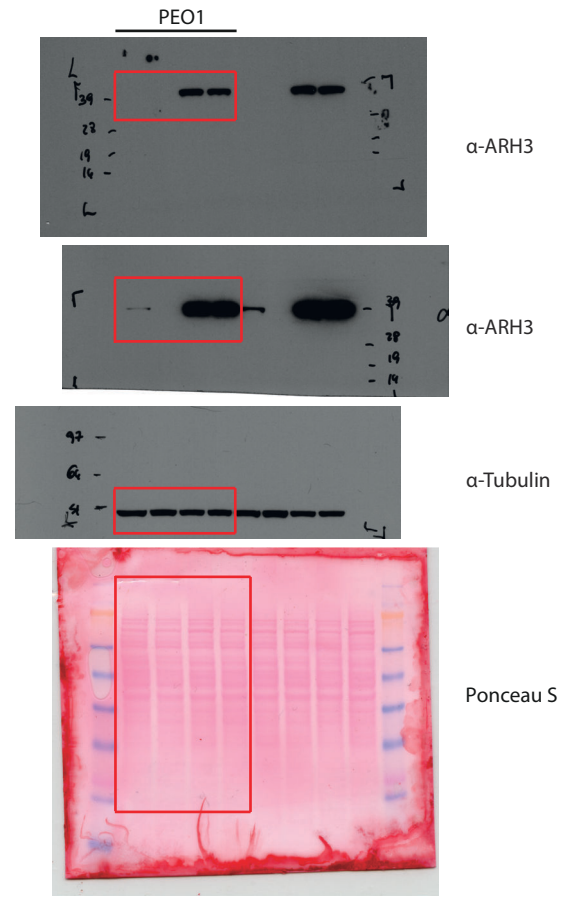



FIGURE S5A

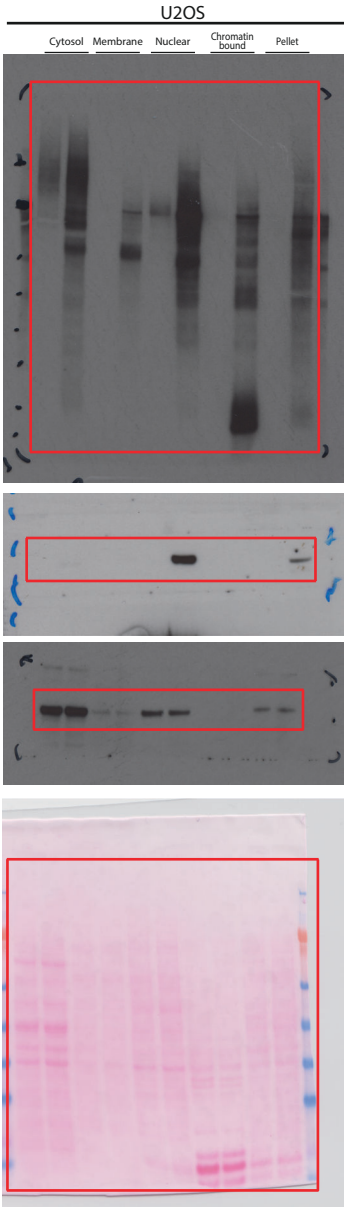

FIGURE S5B

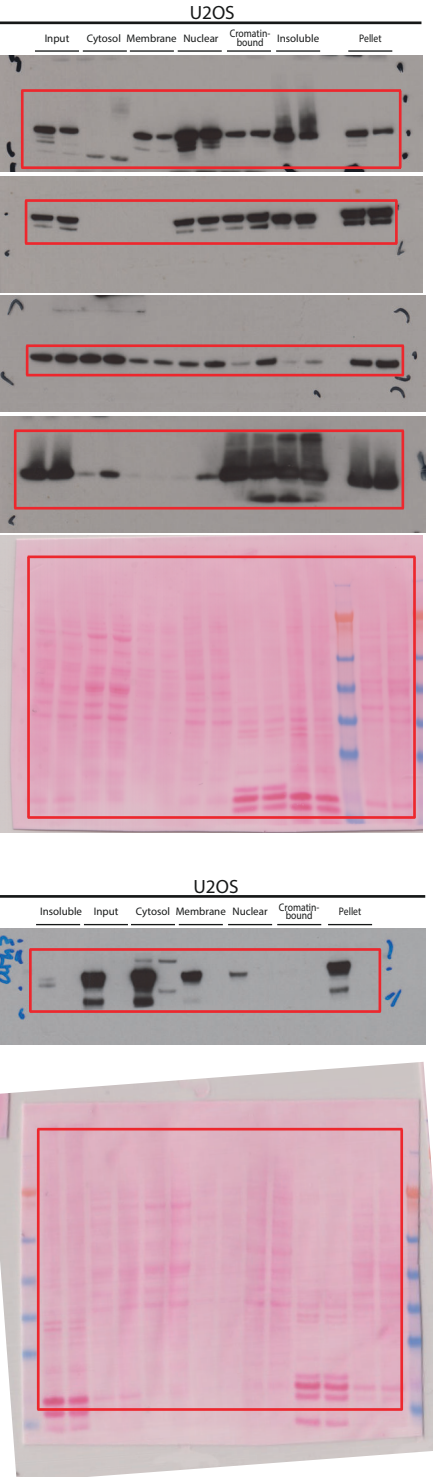

FIGURE S6C

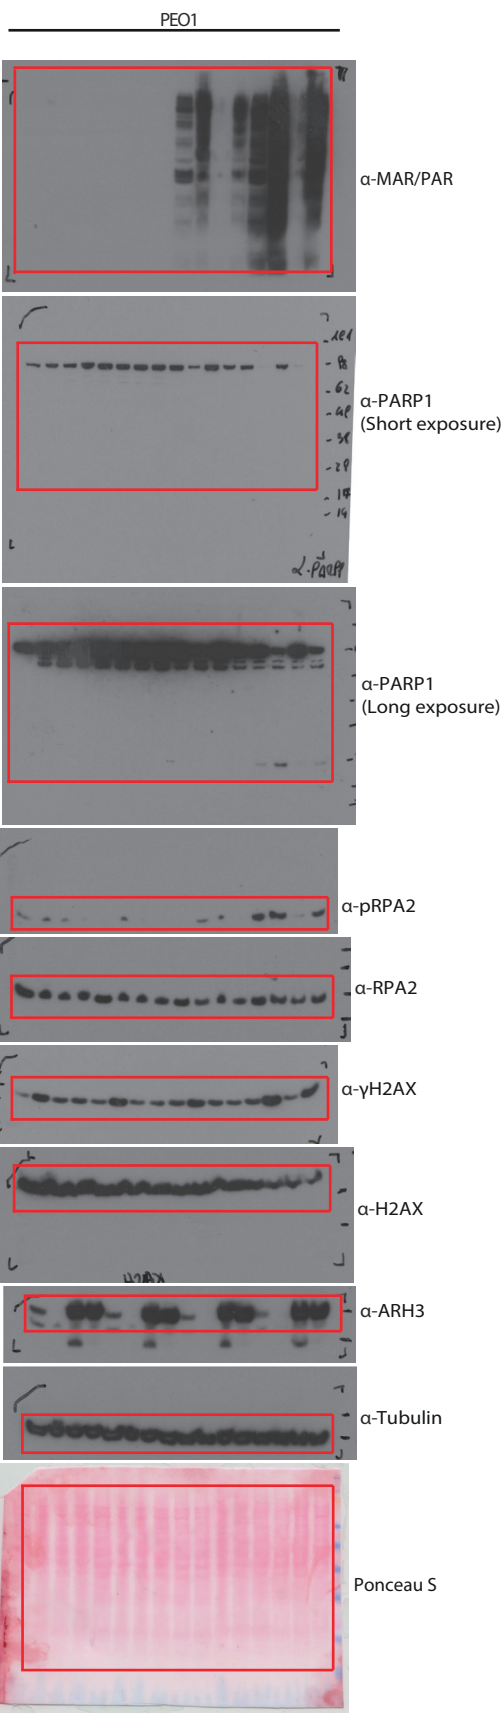

Supplement: mmc3.pdf [file mmc3.pdf]
